# Supplementary material
Source: PubMed Central journal article supplement (PMC2628451)

Type of file: figure

Label: S-Fig-1

Filename: Fig S1.jpg

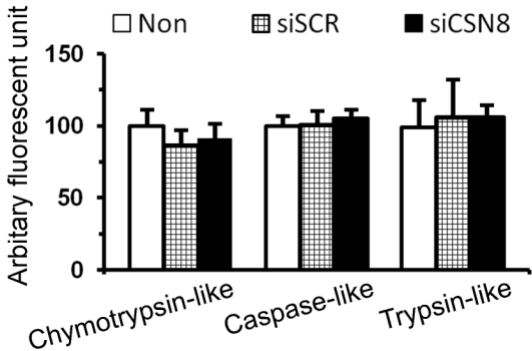

Type of file: figure

Label: S-Fig-2

Filename: Fig S2.jpg

|              | <i>Non</i> |   | <i>siCSN8</i> |   | <i>Non</i> |   | <i>siCSN8</i> |   |
|--------------|------------|---|---------------|---|------------|---|---------------|---|
|              |            |   |               |   |            |   |               |   |
| Cell lysates | +          | + | +             | + | +          | + | +             | + |
| myc-Ub       | -          | - | +             | + | +          | + | +             | + |
| ERS          | +          | + | -             | - | +          | + | +             | + |
| MG132        | +          | + | +             | + | +          | + | +             | + |

anti-Myc

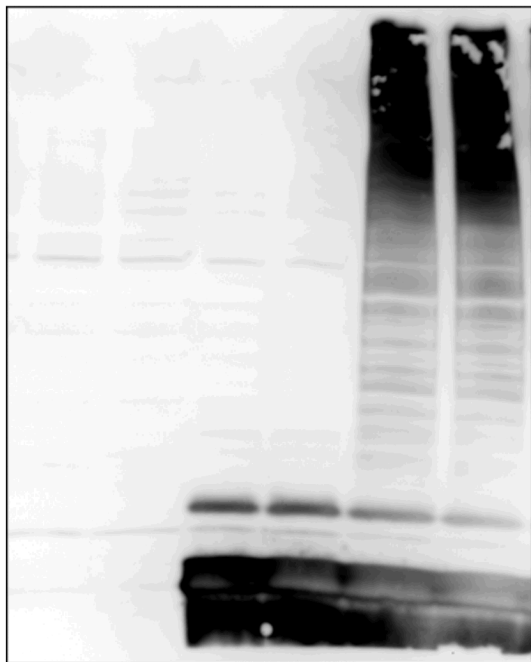

Supplement: NIHMS81906-supplement-1.pdf [file NIHMS81906-supplement-1.pdf]
